# Supplementary material for: AFP promotes HCC progression by suppressing the HuR-mediated Fas/FADD apoptotic pathway
Source: PubMed Central journal article supplement (PMC7532541; doi:10.1038/s41419-020-03030-7), 2020-10-02
Supplement: 41419_2020_3030_MOESM11_ESM.pdf [file 41419_2020_3030_MOESM11_ESM.pdf]

## Supplementary Table 1

Primers used for genotyping, gene cloning, qRT-PCR, and siRNA knockdown.

| Gene               | Forward primer (5'-3')                  | Reverse primer (5'-3')                                         | Application                                  |
|--------------------|-----------------------------------------|----------------------------------------------------------------|----------------------------------------------|
| Afp                | P1: CGCCGCCTGAACTACT<br>GAAACAAT        | P2: CCGGAACTAGACATGA<br>GACCC<br>P3: GAAGAGTTCTTGCAGC<br>TCGGT | <i>Afp</i> <sup>-/-</sup> mice<br>genotyping |
| Fas                | CGGAATTCGCCACCATGCT<br>GGGCATCTGGACCCT  | GCTCTAGAGACCAAGCTTT<br>GGATTTCAT                               | Cloning                                      |
| HuR                | CGGAATTCGCCACCATGTCT<br>AATGGTTATGAAGAC | GCTCTAGATTTGTGGGACTT<br>GTTGGTTTTGA                            | Cloning                                      |
| Human Fas promoter | GGGTACCAAGCTTTTTTGG<br>CTACATTTTT       | CAGATCTGGTTGTTGAGCA<br>ATCCTCCGAA                              | Cloning                                      |
| Human Fas 3'-UTR   | CTAGCTAGCAGTGAAAAAC<br>AACAAATT         | CTAGCTAGCTGTTAAGAAAA<br>CATGGTT                                | Cloning                                      |
| Mouse Fas 3'-UTR   | GCTCTAGAAAACCTCA<br>GTTCCAGCCAT         | GCTCTAGAGAAATGCAAAA<br>AGAGATACTT                              | Cloning                                      |
| AFP                | CCAACAGGAGGCCATGCTT<br>GCTT             | GAATGCAGGAGGGACATAT<br>GTTT                                    | qRT-PCR                                      |
| Fas                | TGGGGTGGCTTTGTCTTCTT                    | TCTGTTCTGCTGTGTCTTGG<br>A                                      | qRT-PCR                                      |
| HuR                | CACAGCTTGGGCTACGGCT<br>TTGTG            | AGGACCCGCGAGTTGATGA<br>TCCG                                    | qRT-PCR                                      |
| GAPDH              | ACGGATTTGGTCGTATTGGG<br>C               | CTCGCTCCTGGAAGATGGT<br>GAT                                     | qRT-PCR                                      |
| siAFP1#            | AUAAGUGUCCGAUAAUAUGUCAGC                |                                                                | Gene<br>silence                              |
| siAFP2#            | CCAGAACACUGCAUAGAAATT                   |                                                                | Gene<br>silence                              |

|                           |                           |                 |
|---------------------------|---------------------------|-----------------|
| shAFP                     | AUAAGUGUCCGAUAAUAAUGUCAGC | Gene<br>silence |
| Nontarget<br>siRNA (, NC) | UGGUUUACAUGUCGACUAA       | Gene<br>silence |
